# Supplementary material for: How to use empirical data to improve transportation infrastructure risk assessment
Source: Copernicus journal article supplement (doi:10.5194/nhess-2021-277), 2021-10-19
Supplement: Supplementary file 1 [file Historical railway damage by rainfall-induced hazards.xlsx]

## Sheet: damage information
Damage date	Url	Railway name	Damage segment	Damage state
2000-08-16	http://www.tangwai.com/sitehtml/webhtm/2010/1550/78699.htm	Baocheng railway	Banzhuyuan-Majiaba	Embankment, Moderate
2000-08-17	http://www.tangwai.com/sitehtml/webhtm/2010/1550/78699.htm	Baocheng railway	Banzhuyuan-Majiaba	Geological, Moderate
2001-06-12	http://news.sina.com.cn/c/277568.html	Lizhan railway	Litang-Fengming	Embankment, minor; Geological, Moderate
2001-07-03	http://news.sina.com.cn/c/293619.html	Nankun railway	Natong-Shuangdeng	Geological, Moderate
2001-07-03	http://news.sina.com.cn/c/293619.html http://news.sina.com.cn/c/296347.html	Nankun railway	Natong-Shuangdeng	Embankment, minor; Geological, minor
2001-07-03	http://news.sina.com.cn/c/293619.html	Nankun railway	Badu-Pinlincun	Embankment, minor
2002-06-09	http://news.southcn.com/china/important/200206110489.htm http://news.sohu.com/85/54/news201415485.shtml	Longhai railway	Baqiao-Yaocun	Bridges/Viaducts, severe
2002-06-16	http://news.sina.com.cn/c/2002-06-17/1852608029.html http://news.sina.com.cn/c/2002-06-17/1954608121.html	Xianggui railway	Yongfu-Putao	Geological, Moderate; Electrification, minor
2002-06-17	http://news.sina.com.cn/c/2002-06-18/2049609439.html	Yingxia railway	Panfang-Yangkou	Embankment, minor
2002-08-08	http://news.sohu.com/64/45/news202574564.shtml http://news.sina.com.cn/c/2002-08-09/1844666653.html	Jingguang railway	Pingshi-Baishidu	Embankment, Moderate; Track, Moderate
2002-08-08	http://news.sohu.com/64/45/news202574564.shtml	Jingguang railway	Liangtian-Aoshang	Geological, severe; Embankment, minor
2002-08-18	http://www.chinanews.com/2002-08-20/26/213963.html http://news.sohu.com/62/28/news202752862.shtml	Jingjiu railway	Datangbu-Tieshikou	Embankment, Moderate; Track, minor
2002-08-19	http://news.sina.com.cn/c/2002-08-20/1724681469.html	Jingjiu railway	Tieshikou-Xiaojiang	Embankment, Moderate
2002-10-30	http://www.southcn.com/news/china/zgkx/200211020248.htm	Jingjiu railway	Ganxian-Ganzhoudong	Embankment, Moderate
2002-10-30	http://www.southcn.com/news/china/zgkx/200211020248.htm	Jingjiu railway	Ganzhouguojigang-Longzixiaxianlusuo	Embankment, Moderate; Geological, Moderate
2003-06-28	http://news.sina.com.cn/o/2003-06-29/1110287091s.shtml	Jingguang railway	Hengyang-Hengyangbei	Embankment, Moderate
2003-07-04	http://oldweb.chinahighway.com/news/2003/46487.php http://news.sina.com.cn/o/2003-07-08/0911339216s.shtml http://news.sina.com.cn/o/2003-07-08/0911339216s.shtml	Jinghu railway	Chuzhou-Danzi	Embankment, minor; Track, minor
2003-07-05	http://news.sina.com.cn/c/2003-07-18/0818401049s.shtml	Jinghu railway	Wuyi-Danzijian	Embankment, Moderate; Track, minor
2003-07-09	https://wenku.so.com/d/9fd4f2d67cdc8fdac6c22d05a0adf6e8	Jiaoliu railway	Lixian-Huilong	Embankment, minor; Geological, Moderate
2003-07-09	http://news.sina.com.cn/s/2003-07-17/09411359911.html	Jiaoliu railway	South of Dayong-Guanba	water damage, severe; Embankment, minor
2003-07-13	http://news.sina.com.cn/s/2003-07-14/0656375438s.shtml	Baocheng railway	South entrance of tunnel 24	Embankment, Moderate; Track, minor
2003-08-26	http://news.sina.com.cn/c/2003-08-26/0919636468s.shtml	Jingjiu railway	Fuyang-Heze	Embankment, minor
2003-09-03	http://society.dbw.cn/system/2003/09/04/013420649.shtml	Xikang railway	Changan-Xiaoyu	Geological, Moderate
2003-09-03 12:00:00	http://news.southcn.com/china/zgkx/200309041561.htm http://news.sina.com.cn/c/2003-09-05/0434692761s.shtml	Jingjiu railway	Yulou-Bozhou	Embankment, minor; Track, Moderate
2003-09-05	http://news.sina.com.cn/c/2003-09-05/0434692761s.shtml	Jingjiu railway	Bozhou-Youheji	Embankment, minor; Track, minor
2003-10-13	http://news.sohu.com/79/38/news214413879.shtml	Xikang railway	Fangzhicheng-Lintong	Embankment, severe; Track, Moderate
2004-07-04	http://news.sina.com.cn/c/2004-07-07/00033008409s.shtml	Nankun railway	Baishuihe-Anlong	Geological, minor
2004-07-26	http://www.southcn.com/news/china/zgkx/200407270769.htm	Jingjiu railway	Yuncheng-Liangshan	Embankment, Moderate
2004-07-31	http://news.sina.com.cn/c/2004-08-01/06043258651s.shtml	Dacheng railway	Yingshan-Pengan	Embankment, Moderate; Track, minor
2005-06-04	http://news.sina.com.cn/s/2005-06-06/06056089229s.shtml	Chuanqian railway	Sanjiang-Dongshengba	Track, minor; Geological, Moderate
2005-06-19	http://www.shm.com.cn/newscenter/2005-06/19/content_812548.htm	Yingxia railway	Raoqiao-Gaofu	Geological, severe
2005-06-21	http://news.sina.com.cn/c/2005-06-25/10586266797s.shtml	Yingxia railway	Panfang-Yangkou	Geological, severe
2005-06-21	http://news.sina.com.cn/c/2005-06-25/10586266797s.shtml	Yingxia railway	Xiawangtang-Shaikou	Geological, severe
2005-06-23	http://www.qingdaonews.com/content/2005-06/24/content_4944230.htm	Jingjiu railway	Longchuan-Huizhou	Embankment, Moderate; Track, Moderate
2005-06-23	http://news.sina.com.cn/c/2005-06-24/12137036157.shtml	Yingxia railway	Chenfang-Fuwen	Geological, severe
2005-06-26	http://news.sina.com.cn/c/2005-06-24/12137036157.shtml http://www.chinanews.com/news/2006/2006-06-07/8/740722.shtml	Hennan railway	Xinanpo-Eshan	Embankment, Moderate; Track, Moderate
2005-07-09	http://www.chinahighway.com/news/2005/107642.php	Xiangyu railway	Dazhou-Ankang	Embankment, minor
2005-07-19	http://news.hsw.cn/system/2005/07/20/002061848.shtml	Longhai railway	Xintuoshi-Xinjianhe	Geological, minor
2005-07-19	http://news.sohu.com/20050721/n226387771.shtml	Neikun railway	Hengjiang-Shuifu	Geological, Moderate
2005-07-22	http://news.sina.com.cn/c/2005-07-22/19366504775s.shtml	Longhai railway	Yingyang-Shangjie	Embankment, Moderate; Track, minor
2005-08-12	http://news.sina.com.cn/c/2005-08-24/18256773024s.shtml	Shenji railway	Fushun-Meihekou	Embankment, Moderate; Track, minor
2006-04-12	http://www.gov.cn/jrzg/2006-04/12/content_252125.htm	Zhegan railway	Yichun-Yichunxi	Electrification, Moderate
2006-06-07	http://news.sohu.com/20060608/n243617939.shtml	Yingxia railway	Yangkou-Jianyang-Xiayang	Embankment, minor
2006-06-08	http://news.sohu.com/20060609/n243635023.shtml	Yingxia railway	Zhuozhai-Luzhi	Embankment, minor
2006-06-08	http://news.sina.com.cn/o/2006-06-08/16299154810s.shtml	Jingjiu railway	Guanxizhen-Longnan	Embankment, minor; Geological, minor
2006-07-03	http://news.sohu.com/20060704/n244074666.shtml	Longhai railway	Gongyidong-Mugou	Embankment, Moderate
2006-07-15	http://news.sina.com.cn/o/2006-07-18/09089490067s.shtml http://news.sohu.com/20060717/n244303710.shtml http://www.gov.cn/jrzg/2006-07/16/content_337301.htm	Jingguang railway	Pingshi-Zhangtan	Embankment, Moderate
2006-07-15	http://news.sina.com.cn/c/2006-07-16/13169474804s.shtml http://news.sohu.com/20060716/n244280415.shtml	Jingguang railway	Matianxu-Xujiadong	Embankment, minor; Geological, minor
2007-07-09	http://www.chnrailway.com/news/20070712/0712203346.html	Chengyu Railway	Yingxiangjie-Shiyanqiao	Embankment, Moderate; Track, minor
2007-07-23	http://news.sohu.com/20070724/n251220618.shtml	Guikun railway	Erdaoyan-Cichong	Geological, Moderate
2007-08-06	http://unn.people.com.cn/GB/14796/21796/6082220.html	Baocheng railway	Banzhuyuan-Luomiaozhen	Geological, severe
2007-08-10	http://www.gov.cn/jrzg/2007-08/11/content_713335.htm	Yuehai railway	Leizhou-Longmen	Embankment, minor; Track, Moderate
2007-10-08	http://zjnews.zjol.com.cn/05zjnews/system/2007/10/08/008860586.shtml	Jinwen railway	Wenxi-Shuangchao	Geological, Moderate
2008-06-14	http://cyfd.cnki.com.cn/article/n2010090840000267.htm	Xiangyu railway	Nanxigou-Dazhuyuan	Embankment, Moderate
2008-07-22	http://www.cupta.org/newsx.php?id=1587	Yuhuai railway	Fuling-Fulingxi	Embankment, minor
2009-04-24	http://www.ce.cn/cysc/jtys/tielu/200904/27/t20090427_18923120.shtml http://info.cm.hc360.com/2009/04/301453120610.shtml	Yuhuai railway	Yangtou-Tongrendong	Geological, Moderate; Electrification, minor
2009-07-02	http://china.zjol.com.cn/05china/system/2009/07/03/015643486.shtml	Hukun railway	Yichun-Xicun	Embankment, minor
2009-07-15	http://news.huochepiao.com/2009-7/200972294725.htm	Baocheng railway	Jiangyou-Mianyang	Geological, Moderate
2009-07-16	http://news.sohu.com/20090718/n265308798.shtml	Baocheng railway	Guangyuan-Jiangyou	Embankment, Moderate
2009-07-26	http://news.huochepiao.com/2009-7/2009728113810.htm	Nankun railway	Weishe-Datianbian	Geological, Moderate
2010-05-06	http://www.gov.cn/jrzg//2010-05/06/content_1600836.htm http://news.sina.com.cn/c/2010-05-07/012117473241s.shtml	Jingguang railway	Dakengkou-Wushi	Geological, severe
2010-05-23	http://news.sohu.com/20100523/n272285954.shtml	Hukun railway	Yujiang-Dongxiang	Geological, Moderate
2010-05-31	http://news.66wz.com/system/2010/06/05/101933634.shtml	Xianggui railway	Fenghuang-Laibin	Embankment, minor; Track, minor
2010-06-01	http://m.huoche.net/show_25396	Xianggui railway	Liangjiang-Pingtang	Embankment, minor; Track, Moderate
2010-06-08	http://news.qq.com/a/20100609/001261_1.htm	Jiaoliu railway	Dalongcun-Gudapo	Embankment, minor
2010-06-08	http://news.sina.com.cn/o/2010-06-09/203017634505s.shtml	Hukun railway	Xupu-Chuanshui	Geological, severe
2010-06-08	http://news.huochepiao.com/2010-6/201061193955.htm	Xiangyu railway	Gucheng-Huangjiaying	Embankment, minor; Geological, Moderate
2010-06-14	http://news.sina.com.cn/c/2010-07-01/110217738502s.shtml	Fengfu railway	Laizhou-Wangfu	Embankment, Moderate
2010-06-14	http://news.sina.com.cn/c/2010-07-01/110217738502s.shtml	Hukun railway	Hulushan-Xiaguoxi	Embankment, Moderate
2010-06-15	http://jiangxi.jxnews.com.cn/system/2010/06/21/011410518.shtml	Yingxia railway	Chengmen-Maitian	Embankment, minor
2010-06-16	http://jiangxi.jxnews.com.cn/system/2010/06/21/011410518.shtml	Yingxia railway	Maiyuan-Chengmen	Embankment, minor
2010-06-16	http://news.ifeng.com/mainland/special/zqjubuzaodafengxiji/content-2/detail_2010_06/18/1638568_0.shtml	Jingjiu railway	Longnan-Guanxizhen	Geological, minor
2010-06-17	http://news.sohu.com/20100621/n272956980.shtml	Jingjiu railway	Youlan-huangmian	Embankment, minor
2010-06-17	http://jiangxi.jxnews.com.cn/system/2010/06/21/011410518.shtml	Yingxia railway	Qianban-Chengmen	Embankment, minor
2010-06-18	http://news.sina.com.cn/c/2010-07-01/110217738502s.shtml	Fengfu railway	Anji-Yanping	Embankment, Moderate
2010-06-18	http://news.sina.com.cn/c/2010-07-01/110217738502s.shtml	Fengfu railway	Jinshacun-Hulushan	Geological, Moderate
2010-06-18	http://jiangxi.jxnews.com.cn/system/2010/06/21/011410518.shtml	Yingxia railway	Chengmen-Maiyuan	Embankment, minor
2010-06-19	http://www.gov.cn/jrzg/2010-08/30/content_1691523.htm	Yingxia railway	Zixi-Tieguancun	Embankment, Moderate; Track, Moderate
2010-06-19	http://www.chnrailway.com/news/2010629/20106299453586959438.shtml	Hukun railway	Yingtan-Yujiang	Embankment, minor
2010-06-19	http://www.chnrailway.com/news/2010629/20106299453586959438.shtml	Hukun railway	Hetanbu-Guixi	Embankment, minor
2010-06-19	http://jiangxi.jxnews.com.cn/system/2010/06/21/011410518.shtml	Yingxia railway	Zhuozhai-Qianban	Embankment, minor
2010-06-20	http://www.chnrailway.com/news/2010629/20106299453586959438.shtml	Hukun railway	Yingtan-Yujiang	Embankment, Moderate
2010-06-22	https://www.chnrailway.com/news/20100701/0701291511.html	Yingxia railway	Zixi-Tieguancun	Embankment, Moderate
2010-06-24	http://news.qq.com/a/20100626/000412.htm	Yingxia railway	Yingtan-Zixi	Embankment, Moderate
2010-06-24	http://news.sina.com.cn/o/2010-06-26/031617711049s.shtml	Luozhan railway	Shuangbanqiao-Chayuan	Geological, severe
2010-07-01	http://huoche.mipang.com/news-1715816.html	Jingjiu railway	Heze-Liaocheng	Embankment, Moderate; Track, Moderate
2010-07-09	http://rail.ally.net.cn/html/2010/guoneizixun_0712/19410.html	Chuanqian railway	Daheba-Xinchang	Geological, Moderate
2010-07-16	http://www.peoplerail.com/rail/show-144-75932-1.html	Jingguang railway	Shuangdonghe-Liulin	Geological, minor
2010-07-16	http://www.peoplerail.com/rail/show-144-75932-1.html	Jingguang railway	Liulin-Lijiazhai	Geological, minor
2010-07-17	http://www.gov.cn/jrzg/2010-07/19/content_1658130.htm	Xiangyu railway	Ankang-Dazhou	Geological, severe; Embankment, minor
2010-07-18	http://news.huochepiao.com/2010-8/20108984722.htm	Xiangyu railway	Xiangyang-Ziyang	Geological, Moderate
2010-07-24	http://news.hsw.cn/system/2010/07/26/050575776.shtml	Longhai railway	Guozhen-Wolongsi	Bridges/Viaducts, Moderate
2010-07-24	https://news.qq.com/a/20100726/000206.htm	Longhai railway	Tiemen-Nangangcun	Embankment, Moderate; Track, minor
2010-07-24	http://news.sohu.com/20100726/n273754477.shtml	Longhai railway	Miaogou-Zhangmao	Geological, severe
2010-07-24	http://news.sohu.com/20100730/n273876643.shtml	Lanyu railway	Yaodu-Fengxiangyuan	water damage, severe
2010-07-25	http://news.sohu.com/20100726/n273754610.shtml	Baocheng railway	Guanyinba-Ranjiahe	Geological, severe
2010-07-28	https://news.qq.com/a/20100813/000568.htm	Shenji railway	Quchaihe-Jilinxi	Electrification, minor; Signaling and Communications, minor；Embankment, minor
2010-08-09	http://paper.dzwww.com/dzrb/data/20100812/html/3/content_8.html	Jingjiu railway	Liaocheng-Fulou	Embankment, Moderate; Track, Moderate
2010-08-21	http://www.peoplerail.com/rail/show-131-74825-1.html	Chengyu Railway	Zizhong-Taojiagou	Geological, severe
2010-08-21	http://news.qq.com/a/20100822/000231.htm?olc	Shendan railway	Dandong-Jinshanwan	Embankment, Moderate
2011-06-17	http://tianqi.cncn.com/jiuquan/news-74436	Lanxin railway	Daquan-Xiaoquandong	Embankment, minor
2011-07-24	https://henan.qq.com/a/20110725/000063.htm	Longhai railway	Gongyi-Shanggai	Embankment, minor
2011-07-27	http://sc.sina.com.cn/news/sc-all/2011-07-29/259-56735_2.html	Neiliu railway	Neijiang-Liupanshui	Geological, Moderate
2011-09-18	https://tieba.baidu.com/p/1215632804?__pc2ps_ab=2655XLIi5b37ko0mswW7SS4Lqdk%2FNugbOeb2IrZw3YQRw1ngZlF67Gd3BKiHAJ6eLYhGuyGMbmAvaTviD%2F%2FHU4KnMQCtYgs97wSma6O%2BKBtqc5T6imWoDwglgnOyM%2FG6N2rZ%7C1622799543%7Cc4c50075dcc0fd35eacf83fc01d23bfd%7Cc4c50075dcc0fd35eacf83fc01d23bfd&p_sign=c4c50075dcc0fd35eacf83fc01d23bfd&p_signature=c4c50075dcc0fd35eacf83fc01d23bfd&p_timestamp=1622799543&p_tk=2655XLIi5b37…	Baocheng railway	Guanyinshan-Yangjiawan	Geological, Moderate
2011-09-20	http://news.sohu.com/20110922/n320190313.shtml	Longhai railway	Guanyintang-Miaogou	Embankment, minor; Geological, Moderate
2012-05-25	http://www.gov.cn/gzdt/2012-05/23/content_2143433.htm http://news.qq.com/a/20120526/000124.htm	Nankun railway	Shanxin-Silin	Embankment, Moderate
2012-06-04	http://www.chinanews.com/df/2012/06-04/3937983.shtml	Nanjiang railway	Kuerlebei-Kuerlexi	water damage, Moderate
2012-06-05	http://blog.liieghcf.net/lxcs/8892.html	Jiajing railway	Qiaoxi-Langweishan	Geological, Moderate
2012-06-05	http://bbs.tianya.cn/post-free-2571040-1.shtml	Lanxin railway	Yumendong-Heishanhu	Geological, minor
2012-06-05	http://bbs.tianya.cn/post-free-2571040-1.shtml	Lanxin railway	Wutongxian-Gaotai	water damage, minor
2012-06-10	http://news.qq.com/a/20120611/000480.htm	Hukun railway	Shiquan-Heye	Embankment, minor; Geological, Moderate
2012-06-11	http://native.cnr.cn/city/201206/t20120612_509883888.shtml	Yingxia railway	Xipo-Mianliang	Embankment, minor
2012-06-25	http://news.huochepiao.com/2012-8/20128617070097.htm	Chuanqian railway	Wujiang-Dongjiaping	Embankment, Moderate
2012-07-07	http://sh.eastday.com/m/20120713/u1a6703406.html	Longhai railway	Yuchengxian-Zhanggezhuang	Embankment, minor
2012-07-08	http://sh.eastday.com/m/20120713/u1a6703406.html	Longhai railway	Yuntaishan-Yantuo	Embankment, Moderate
2012-07-08	http://sh.eastday.com/m/20120713/u1a6703406.html	Longhai railway	Yuntaishan-Lianyungangdong	Embankment, Moderate
2012-07-08	http://district.ce.cn/newarea/roll/201207/09/t20120709_23472872.shtml	Jingjiu railway	Shangqiu-Shangqiubei	water damage, Moderate
2012-07-08	http://news.huochepiao.com/2012-7/20127116302673.htm	Baocheng railway	Yangpingguan-Chaotian	Embankment, Moderate
2012-07-08	http://news.cntv.cn/china/20120709/100175.shtml http://native.cnr.cn/city/201208/t20120813_510575394.html	Baocheng railway	Guanyinba-Chaotian	Geological, Moderate; Electrification, minor
2012-07-09	http://c.360webcache.com/c?m=a70adcec83fae190ace567fbd958843f&q=%E9%99%87%E6%B5%B7%E7%BA%BFK38%2B690%E5%87%BA%E7%8E%B0%E9%95%BF10%E7%B1%B3%E8%B7%AF%E5%9F%BA%E5%A1%8C%E6%96%B9%EF%BC%8C%E8%B7%AF%E8%82%A9%E4%B8%8B%E6%BB%91%E8%BE%BE%E5%88%B01.5%E7%B1%B3%E6%B7%B1&u=http%3A%2F%2Fnews.ifeng.com%2Fgundong%2Fdetail_2012_07%2F13%2F16013633_0.shtml	Longhai railway	Baitabu-Baozhuang	Embankment, Moderate
2012-07-13	http://blog.sina.com.cn/s/blog_ae4fd88901017i5f.html	Baolan railway	Huinong-Hongguozi	Embankment, Moderate; Track, Moderate
2012-07-17	http://www.weather.com.cn/ningxia/tqxs/07/1677519.shtml	Baolan railway	Yinchuan-Qingtongxia	Embankment, minor
2012-07-21	http://roll.sohu.com/20120723/n348772486.shtml	Chengkun railway	Ebian-baicun	Geological, Moderate
2012-07-21	http://liangshan.scol.com.cn/lsjtxlb/content/2012-07/23/content_51261343.htm?node=154782	Chengkun railway	Hanyuan-Niri	Geological, Moderate
2012-07-21	http://gotrip.zjol.com.cn/05gotrip/system/2012/07/22/018675158.shtml	Baocheng railway	Juting-Miehuogou	Geological, Moderate; Electrification, minor
2012-07-26	https://huoche.mipang.com/news-1711757.html	Jingbao railway	Chasuqi-Bikeqi	Bridges/Viaducts, minor
2012-07-26	http://news.iqilu.com/china/gedi/2012/0726/1281110.shtml	Jingbao railway	Jining-Huhehaote	Geological, Moderate
2012-08-02	http://news.enorth.com.cn/system/2012/08/03/009764282.shtml	Jingha railway	Shanhaiguan-Longjiaying	Embankment, minor; Geological, Moderate
2012-08-03	http://www.chnrailway.com/news/20120811/0811407134.html	Yanshi railway	Zhangqiu-Wangcun	Electrification, minor
2012-08-04	http://www.chinanews.com/gn/2012/08-05/4083531.shtml	Jingha railway	Shanhaiguan-Wanjiatun	Embankment, minor
2012-08-04	http://news.sina.com.cn/c/2012-08-05/023924907642.shtml	Shenshan railway	Wanjiatun-Shanhaiguan	Embankment, minor
2012-08-04	http://weather.news.sina.com.cn/news/2012/0806/083579084.html	Wenfu railway	Luoyuan-Toubao	Water damage, severe
2012-08-09	http://www.chnrailway.com/news/20120812/0812407197.html	Wangan railway	Jingdeizhen-Fuliangnansuo	Water damage, severe
2012-08-13	http://www.chnrailway.com/news/20120814/0814407640.html	Baotian railway	Baoji-Renjiawan	Water damage, severe
2012-09-01	http://chnrailway.com/news/20120906/0906411731.html	Chengkun railway	Xide-Lianhexiang	Electrification, Moderate
2013-03-26	http://m.huoche.net/show_216027	Yizhan railway	Shuangbanqiao-Hongshandian	Geological, Moderate
2013-04-18	http://dx.gswlpt.com/item/133323.aspx	Fengfu railway	Xiaguoxi-Youxikou	Geological, minor
2013-05-16	http://bbs.tianya.cn/post-free-3353280-1.shtml	Jingguang railway	Maba-Wushi	Water damage, severe
2013-05-16	http://bbs.tianya.cn/post-free-3353280-1.shtml	Jingguang railway	Wushi-Dakengkou	Track, Moderate
2013-05-29	http://www.chinanews.com/df/2013/05-30/4876316.shtml	Nankun railway	Chajiang-Xiaodejiang	Track, minor
2013-07-01	http://www.eeb.cn/tabid/372/infoid/1521/frtid/89/default.aspx	Baoxi railway	Shenmu-Shenmunan	Geological, severe
2013-07-09	http://www.xinjiangnet.com.cn/xj/corps/201307/t20130709_3361497_1.shtml	Lanxin railway	Tulufan-Zhengzhuquan	Water damage, Moderate
2013-07-09	http://www.chnrailway.com/news2/gntl/2013/07/245289.shtml	Nanjiang railway	Tuokexun-Wangbu	Water damage, Moderate
2013-07-09	http://www.xinjiangnet.com.cn/xj/corps/201307/t20130709_3361497_1.shtml	Lanxin railway	Xiaputule-Tianshan	Water damage, minor
2013-07-10	http://native.cnr.cn/city/201307/t20130711_513031832.html	Baocheng railway	Luojiang-Huangxu Mianyanhe bridge	Bridges/Viaducts, minor
2013-07-13	http://www.eeb.cn/tabid/372/infoid/1521/frtid/89/default.aspx	Baoxi railway	Yanan-Yananbei	Embankment, Moderate
2013-07-14	http://bbs.tianya.cn/post-free-3480554-1.shtml	Baoxi railway	Suide-Yanan	water damage, severe
2013-07-21	http://www.huoche.net/show_289535	Longhai railway	Qinganzhen-Yangjiahe	Embankment, minor
2013-07-21	http://society.people.com.cn/n/2013/0722/c136657-22278915.html	Longhai railway	Tianshui-Baoji	Geological, minor
2013-07-22	http://www.eeb.cn/tabid/372/infoid/1521/frtid/89/default.aspx	Baoxi railway	Yanan-Yananbei	Embankment, Moderate
2013-07-22	http://society.people.com.cn/n/2013/0722/c136657-22278915.html	Longhai railway	Tianshui-Lanzhou	Geological, minor
2013-07-25	http://www.gov.cn/gzdt/2013-07/28/content_2456747.htm	Binsui railway	Modaoshi-Beilinjian	Embankment, minor; Geological, Moderate
2013-07-25	http://www.chinanews.com/df/2013/07-25/5085746.shtml	Longhai railway	Gangu-Tianshui	water damage, Moderate
2013-08-08	http://www.sytlj.com/showarticle.aspx?id=5,14421	Shenji railway	Kouqian-Maxiangtun	Electrification, minor
2013-08-12	http://politics.people.com.cn/n/2013/0819/c70731-22613810.html	Suibei railway	Zhayinhe-Helun	Embankment, minor
2013-08-14	http://www.sytlj.com/showarticle.aspx?id=5,14421	Shenji railway	Hailong-Meihekou	Embankment, minor
2013-08-14	http://www.sytlj.com/showarticle.aspx?id=5,14421	Shenji railway	Baoshan-Heishantou	Signaling and Communications, Moderate
2013-08-16	http://www.sytlj.com/showarticle.aspx?id=2,1130	Shenyan railway	Tiebeishan-Nanzamu	Bridges/Viaducts, Moderate
2013-08-17	http://www.cngaosu.com/a/2013/0823/424823.html	Jingguang railway	Tuling-Zhangtan	Geological, Moderate
2013-08-25	http://www.weather.com.cn/news/2013/09/1961740.shtml	Neikun railway	Daguan-Zengjiapingzi	Geological, Moderate
2013-09-11	http://www.chnrailway.com/html/20130916/268619.shtml	Huiyu railway	Tongren-Shaba	Embankment, minor; Geological, Moderate
2013-09-11	http://www.chnrailway.com/html/20130916/268619.shtml	Guanyinling railway	Guanyinling-Taoying	Embankment, minor
2013-10-07	http://roll.sohu.com/20131007/n387669971.shtml	Xiaoyong railway	Yuyao-Shangyu	Geological, severe
2014-04-25	http://www.peoplerail.com/rail/show-135-181510-1.html	Hukun railway	Dongxiang-Yujiang	Embankment, minor
2014-05-10	http://www.gywb.cn/content/2014-07/28/content_1164327.htm	Chuanqian railway	Dazhai-Dulaying	Water damage, severe
2014-06-03	http://politics.people.com.cn/n/2014/0604/c1001-25104564.html	Hukun railway	Xinpingba-Pinba	Geological, minor
2014-06-04	http://news.dahe.cn/2014/06-06/102951519.html	Nankun railway	Weishe-Banqi	Water damage, minor
2014-06-05	http://www.baisezfw.gov.cn/show.php?id=4120&siteid=1	Xianggui railway	Youlan-Xincun	Embankment, minor
2014-06-05	http://news.sohu.com/20140706/n401849185.shtml	Nankun railway	Xiatang-Xitun	Geological, Moderate
2014-06-18	http://m.fznews.com.cn/jsxx/2014-6-20/201462094Qf3S9l1081043_3.shtml	Fengfu railway	Minqing-Daruo	Embankment, minor
2014-06-19	http://gd.sina.com.cn/qy/news/2014-06-20/08562648.html	Jingguang railway	Yingde-Shakou	Geological, severe
2014-06-20	http://www.gov.cn/xinwen/2014-06/20/content_2705277.htm	Yingxia railway	Shaowu-Shunchang	Geological, severe
2014-06-20	http://china.cnr.cn/ygxw/201406/t20140620_515695349.shtml	Yuhuai railway	Huaihua-Tongren	Embankment, minor
2014-07-07	http://blog.sina.com.cn/s/blog_c3e7a8f90102ux0o.html	Chengkun railway	Chanheba-Guancunba	Tunnels, minor; Electrification, minor
2014-07-07	http://news.gaotie.cn/x/2014-07-07/169925.html http://www.weather.com.cn/sichuan/tqyw/07/2150838.shtml	Chengkun railway	Changheba-Hanyuan	Geological, minor
2014-07-14	http://news.gaotie.cn/huochezhan/2014-07-15/171594.html	Hukun railway	Huaihua-Gongping	Geological, minor
2014-07-19	http://gh.crec4.com/content-696-2222-1.html	Hainan huanxian	Longmenzhen-Leizhou	Embankment, Moderate
2014-07-19	http://news.gaotie.cn/anquan/2014-07-21/172841.html	Qibei railway	Yiangucheng-Keshan	Embankment, minor; Geological, minor
2014-08-19	http://zz.mnw.cn/news/787653-2.html	Yingxia railway	Panfang-Yangkou	Embankment, minor
2014-08-19	http://www.gov.cn/xinwen/2014-08/20/content_2737591.htm	Yingxia railway	Shunchang-Panfang	Embankment, minor
2014-08-20	http://zz.fjsen.com/2014-08/21/content_14726656.htm	Yingxia railway	Zhangping-Yongan	Embankment, minor
2014-08-27	http://news.tielu.cn/yixian/2014-09-16/38540.html	Chenkun railway	Hanyuan-Chanheba	Geological, Moderate
2014-09-10	http://sx.sina.com.cn/hanzhong/focus/2014-09-25/084313814.html	Yangan railway	Wudumen-Shahekan	Embankment, minor
2014-09-11	http://sx.sina.com.cn/hanzhong/focus/2014-09-25/084313814.html	Baocheng railway	Dingjiaba-Yanzibian	Geological, minor
2014-09-18	http://news.cnr.cn/native/city/201409/t20140919_516470624.shtml	Baoxi railway	Yanan-Yananbei	Embankment, minor
2015-04-08	http://news.cnhubei.com/xw/hb/hs/201504/t3228989.shtml	Wujiu railway	Huangshi-Dajipu	Geological, minor
2015-05-22	http://www.chnrailway.com/html/20150526/1066103.shtml	Nankun railway	Naning-Lunxu	Embankment, minor
2015-06-03	http://news.tielu.cn/yixian/2015-09-24/78221.html	Chuanqian railway	Daguanchong-Penglai	Embankment, minor; Electrification, minor; Geological, Moderate
2015-06-21	http://hn.rednet.cn/c/2015/06/25/3720209.htm	Luozhan railway	Chayuan-Shuangbanqiao	Geological, Moderate
2015-06-28	http://sichuan.scol.com.cn/fffy/201507/10213398.html	Baocheng railway	Shaxiba-Jianmenguan	Embankment, minor; Geological, minor
2015-07-22	http://www.cngaosu.com/a/2015/0724/543229.html	Yuhuai railway	Qianjiang-Chongqing	Geological, Moderate
2015-07-31	http://news.tielu.cn/yixian/2015-07-31/72100.html	Yizhan railway	Rongxian-Dapocun	Embankment, minor
2015-08-07	http://www.chnrailway.com/html/20150809/1250707.shtml	Longhai railway	Baitabu-Baozhuang	Embankment, minor
2015-11-13	http://www.peoplerail.com/rail/show-479-245011-1.html	Nankun railway	Baise-Tianyang	Embankment, minor
2016-03-23	http://news.tielu.cn/yixian/2016-03-30/101455.html	Yizhan railway	Luotong-Fuyong	Embankment, minor
2016-04-05	http://www.gz.chinanews.com/content/2016/07-15/64866.shtml	Chuanqian railway	Chatan-Shimenkan	Geological, Moderate
2016-04-19	http://news.huochepiao.com/2016-4/2016517319293.htm	Hukun railway	Kailixi-Fuquan	Embankment, minor
2016-05-07	http://www.gz.chinanews.com/content/2016/07-15/64866.shtml	Chuanqian railway	Mengdu-Sanyuanba	Geological, Moderate
2016-05-31	http://www.peoplerail.com/rail/show-135-272921-1.html	Nanjiang railway	Tashidian-Kuerle	Bridges/Viaducts, minor
2016-06-01	http://toutiao.com/i6293083363804709378/	Yuhuai railway	Linshi-Fulinxi	Geological, severe
2016-06-01	http://ah.people.com.cn/n2/2016/0711/c227767-28648056.html	Yuhuai railway	Fulinxi-Fulin	Geological, severe; Embankment, minor
2016-06-02	http://toutiao.com/i6293083363804709378/	Huaiyu railway	Wuling-Zhongzui	Embankment, Moderate
2016-06-14	http://news.tielu.cn/yixian/2016-06-18/108264.html	Hukun railway	Majiang-Guiding	Embankment, minor
2016-06-14	http://toutiao.com/a6296251709627465986/	Jiaoji railway	Wangcun-Zhoucun	Embankment, minor
2016-06-17	http://toutiao.com/i6304752588617155074/	Fengfu railway	Jiangban-Duwu	Geological, Moderate
2016-06-19	http://www.jdzol.com/2016/0621/154122.html	Wangan railway	Fuliang-Hankeng	Embankment, minor
2016-06-20	http://c.360webcache.com/c?m=13d7def5d3b8eb01eff0232e01233f76&q=%E7%9A%96%E8%B5%A3%E9%93%81%E8%B7%AFK48%2B080%E8%87%B3K48%2B130%E6%AE%B5%E8%B7%AF%E5%9F%BA%E8%BE%B9%E5%9D%A1%E5%A1%8C%E6%96%B9200%E4%BD%99%E6%96%B9&u=http%3A%2F%2Fbuild.workercn.cn%2F26669%2F201606%2F22%2F160622143111853.shtml	Wangan railway	Sanyuan-Xiangkouqiao	Embankment, Moderate; Track, minor
2016-06-23	http://news.tielu.cn/yixian/2016-06-28/109268.html	Chengyu railway	Qiezixi-Funiuxi	Embankment, Moderate
2016-06-23	http://news.tielu.cn/yixian/2016-06-28/109268.html	Chengyu railway	Dazu-Changhebian	Embankment, minor
2016-06-27	http://news.gaotie.cn/yunying/2016-06-28/332666.html	Yuhuai railway	Chongqingbei-Yangjiatuo	Embankment, minor
2016-06-27	http://news.tielu.cn/yixian/2016-06-30/109515.html	Chengyu railway	Funiuxi-Qiezixi	Geological, severe
2016-06-29	http://toutiao.com/i6324175162144981506/ https://www.sohu.com/a/111626028_119731 https://tieba.baidu.com/p/4763065096	Chuanqian railway	Ganshui-Chatan	Geological, Moderate; Electrification, minor
2016-07-01	http://mt.sohu.com/20160702/n457453412.shtml	Jingguang railway	Guangshui Town	Embankment, minor
2016-07-03	http://www.sohu.com/a/100869453_119731	Jingguang railway	Zhifang-Tuditang	Geological, severe; Embankment, minor
2016-07-03	https://www.sohu.com/a/100960181_382544	Jingjiu railway	Sidian-Xizhang	Electrification, Moderate
2016-07-03	http://news.ifeng.com/a/20160704/49292818_0.shtml	Ningan railway	Baliwan-Taoxin	Embankment, minor
2016-07-03	http://news.sohu.com/20160704/n457606870.shtml	Jiaoliu railway	Liangtingao-Huangjinao	Geological, Moderate
2016-07-04	http://www.toutiao.com/i6303676450205598209/	Jingguang railway	Changsha、Laodaohe bridge	Bridges/Viaducts, minor
2016-07-04	http://hn.rednet.cn/c/2016/07/05/4026316.htm	Hukun railway	Huaihuadong-Huaihua	Embankment, minor
2016-07-04	http://hn.rednet.cn/c/2016/07/05/4026316.htm	Hukun railway	Gongping-Pozhou	Geological, Moderate
2016-07-04	http://www.toutiao.com/i6303676450205598209/	Jingguang railway	Gongqingcheng-Deyang	Embankment, minor
2016-07-05	http://cq.qq.com/a/20160707/029617.htm	Neikun railway	Tongguxi-Tantou	Geological, severe
2016-07-05	http://cq.qq.com/a/20160707/029617.htm	Neikun railway	Puerdu-Linjiangxi	Geological, severe
2016-07-05	http://cq.qq.com/a/20160707/029617.htm	Neikun railway	Xiaoerping-Tongguxi	Geological, severe
2016-07-09	http://news.tielu.cn/yixian/2016-07-28/111864.html	Jingguang railway	Xinxiangbei-Xinxiang	Embankment, Moderate; Track, Moderate
2016-07-09	http://www.mnw.cn/news/fj/1261441.html https://www.sohu.com/a/104058273_149073	Changfu railway	Nanyang Tunnel	Geological, severe; Embankment, minor
2016-07-09	http://m.sohu.com/n/458618854/	Fengfu railway	Daruo-Minqing	Geological, Moderate
2016-07-17	https://baike.so.com/doc/24425372-25257771.html	Jiaoliu railway	Wanyan-Longbizui	Track, severe
2016-07-19	http://news.tielu.cn/yixian/2016-07-28/111864.html	Jingguang railway	Anyang-Baoliansi	Geological, Moderate
2016-07-19	http://jiangsu.china.com.cn/html/2016/gxnews_0720/6530403.html	Jiaoliu railway	Huaihua-Xiangbizi	Water damage, minor
2016-07-20	http://mt.sohu.com/20160722/n460403362.shtml	Jingha railway	Beidaihe-Shanhaiguan	Water damage, severe; Geological, minor
2016-07-21	http://www.sytlj.com/showarticle.aspx?id=5,31172	Shenshan railway	Shahousuo-Dongxinzhuang	Embankment, Moderate
2016-07-21	http://www.sytlj.com/showarticle.aspx?id=5,31172	Liaoxi railway	Jiubao-Yanggangzi	Embankment, minor
2016-07-22	http://www.toutiao.com/i6310052005087805953/	Chengkun railway	Macun-Leshan	Geological, Moderate
2016-08-18	http://leaders.people.com.cn/n1/2016/0819/c58278-28648125.html	Baoxi railway	Xinjie-Zhongji	Embankment, minor
2016-09-17	http://firm.workercn.cn/513/201609/21/160921112528018.shtml	Chengkun railway	Zhubuzhong bridge	Embankment, Moderate
